# Supplementary material for: Mesitylene Tribenzoic Acid as a Linker for Novel Zn/Cd Metal-Organic Frameworks
Source: MDPI journal article supplement (doi:10.3390/ma15124247), 2022-06-15
Supplement: s1 [file s1]

# Supporting Information

for

## Mesitylene Tribenzoic Acid as a linker for novel Zn/Cd Metal-Organic Frameworks

Dana Bejan <sup>1,†</sup>, Ioan-Andrei Dascalu <sup>1,†</sup>, Sergiu Shova <sup>2</sup>, Alexandru F. Trandabat <sup>3,4</sup> and Lucian G. Bahrin <sup>1,\*</sup>

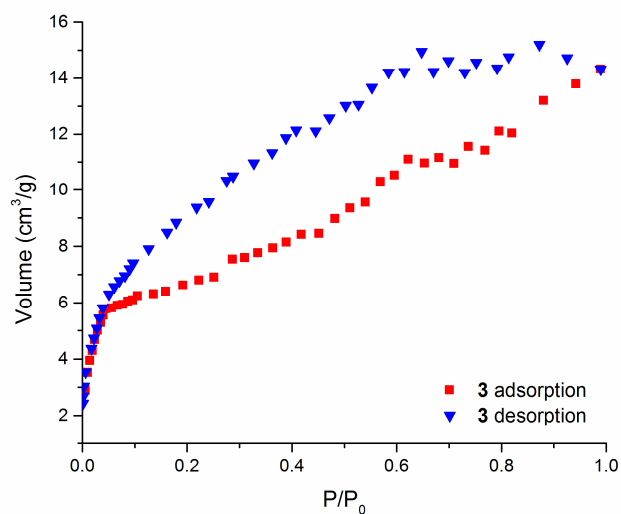

**Figure S1.** N<sub>2</sub> isotherm of **3**.

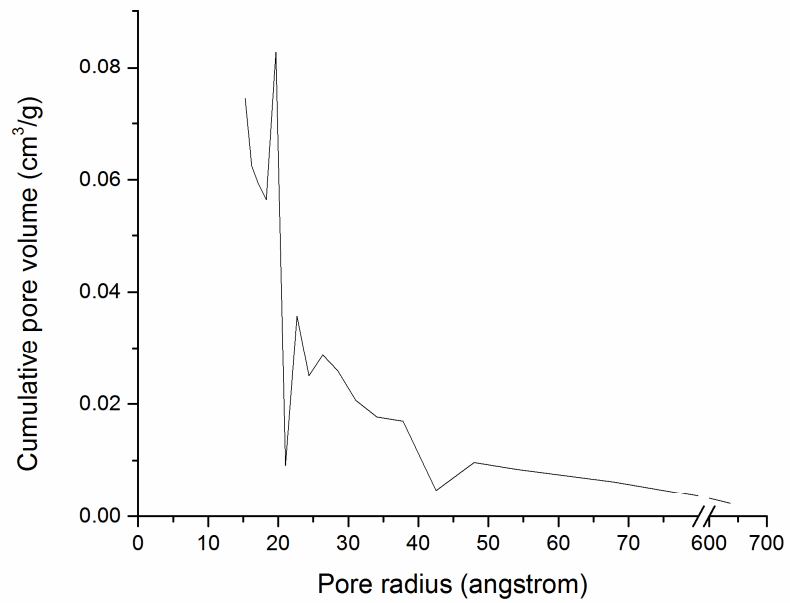

**Figure S2.** BJH pore size distribution of **1**.

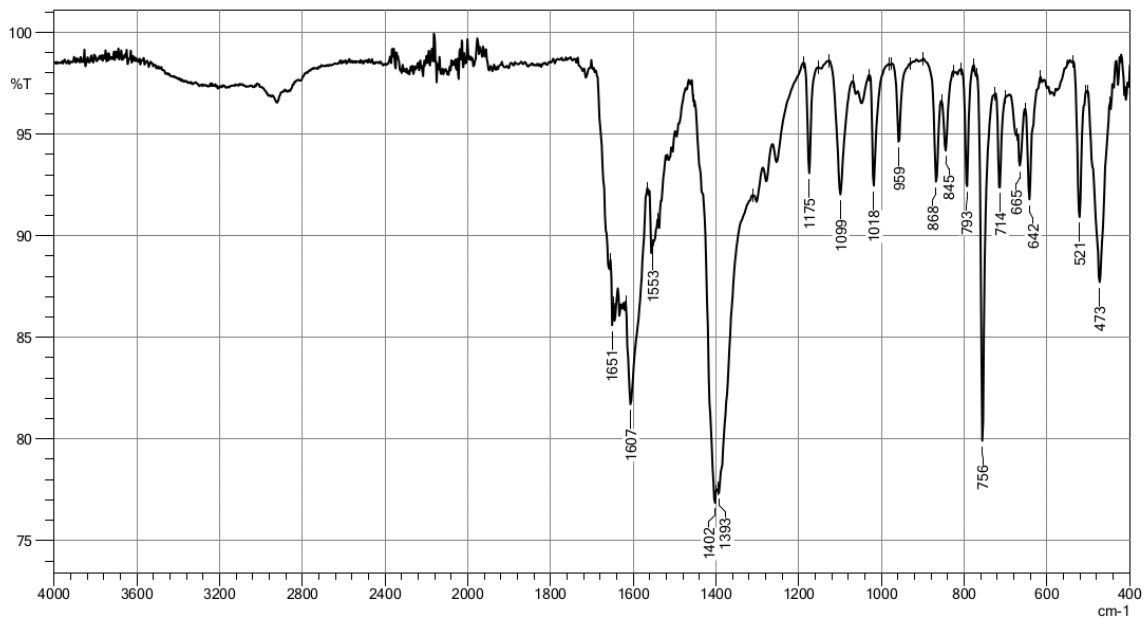

**Figure S3.** Ir spectrum of **1**.

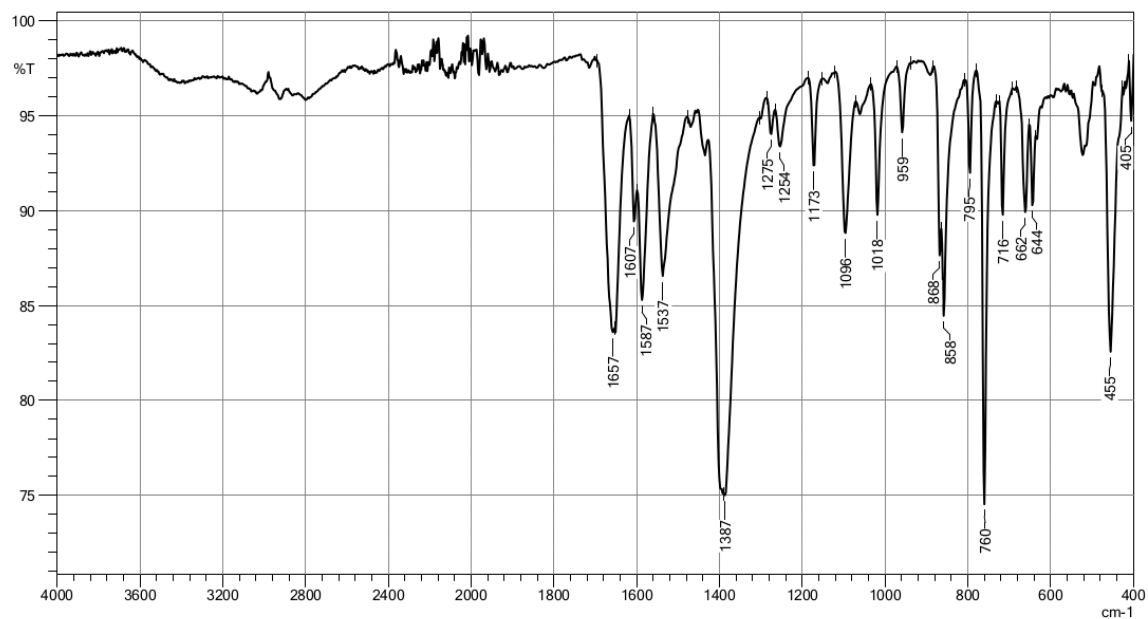

**Figure S4.** Ir spectrum of **2**.

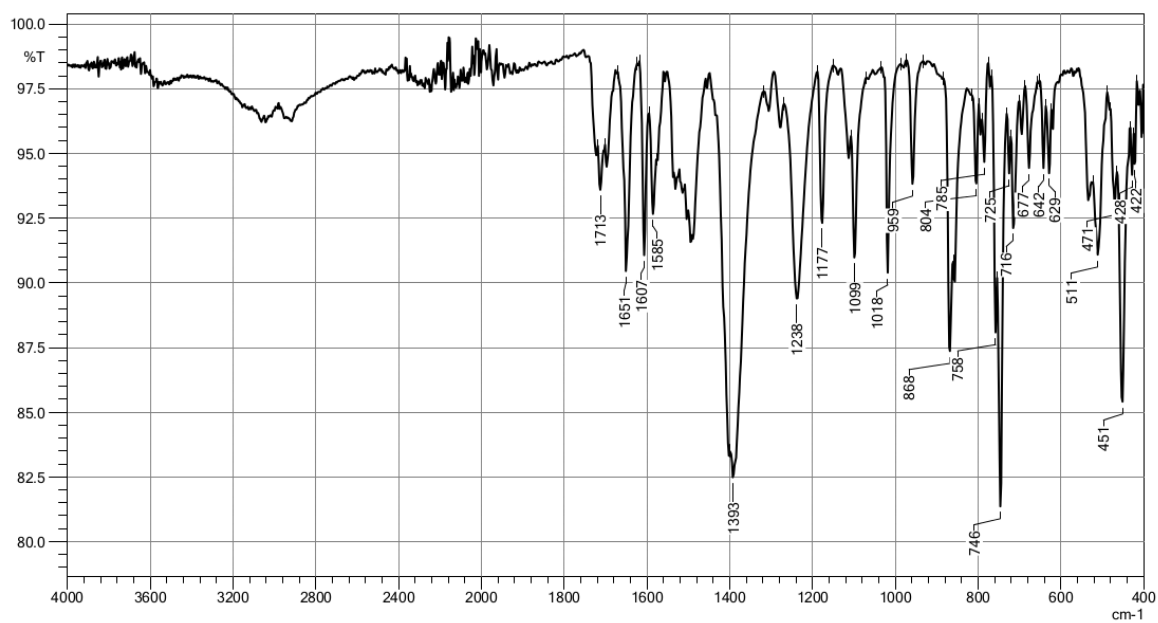

**Figure S5.** IR spectrum of **3**.

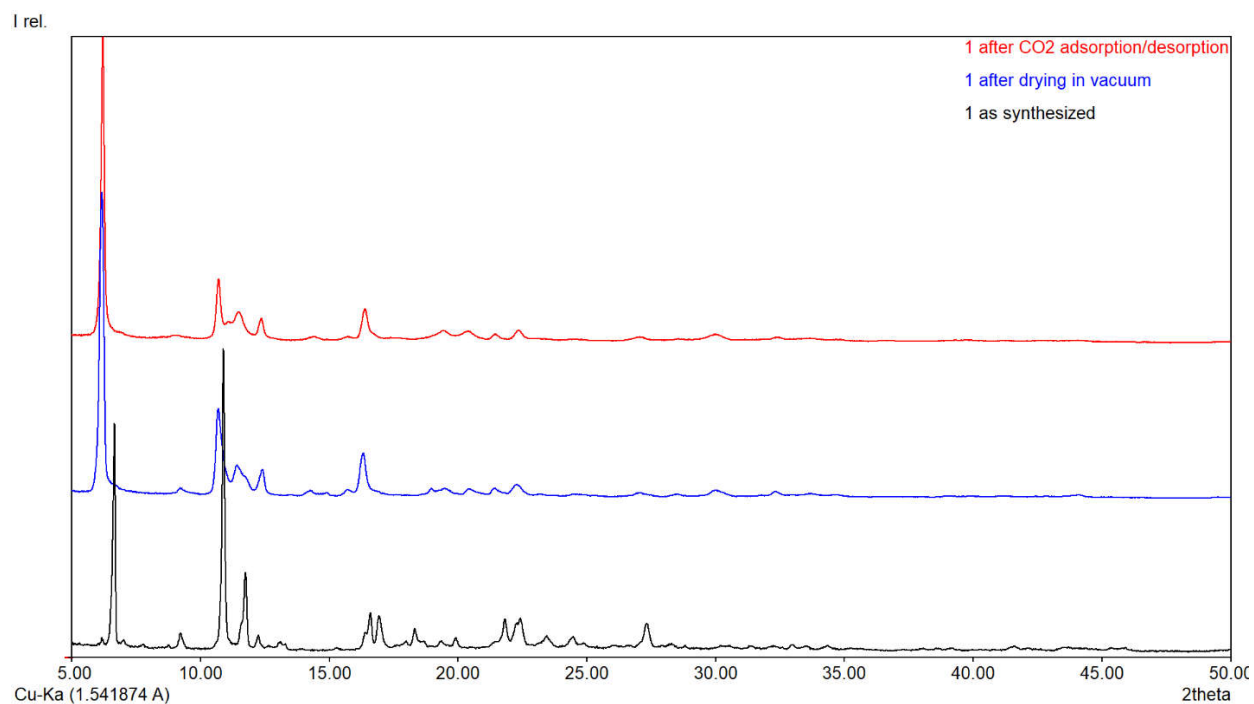

**Figure S6.** Diffractograms corresponding to framework **1** as synthesized (black), after activation (blue) and after CO<sub>2</sub> adsorption/desorption (red).

**Table S1.** Selected bond lengths [Å] for **1**

|                      |           |         |          |
|----------------------|-----------|---------|----------|
| Zn1-O1               | 1.928(4)  | C5-C8   | 1.497(8) |
| Zn1-O3               | 1.982(5)  | C6-C7   | 1.375(9) |
| Zn1-O7 <sup>1</sup>  | 1.933(5)  | C8-C9   | 1.401(8) |
| Zn1-O9 <sup>2</sup>  | 1.944(5)  | C8-C13  | 1.402(8) |
| Zn2-O1 <sub>w</sub>  | 2.116(5)  | C9-C10  | 1.401(8) |
| Zn2-O2               | 2.086(5)  | C9-C15  | 1.522(8) |
| Zn2-O6               | 2.107(5)  | C10-C11 | 1.401(8) |
| Zn2-O8 <sup>1</sup>  | 2.083(5)  | C10-C24 | 1.500(8) |
| Zn2-O10 <sup>2</sup> | 2.072(5)  | C11-C12 | 1.413(8) |
| Zn2-O5               | 2.088(9)  | C11-C16 | 1.513(8) |
| O1-C1                | 1.265(8)  | C12-C13 | 1.413(8) |
| O2-C1                | 1.245(8)  | C12-C17 | 1.493(8) |
| O3-C31               | 1.220(10) | C13-C14 | 1.505(8) |
| O4-C31               | 1.257(10) | C17-C18 | 1.388(9) |
| O6-C35               | 1.232(9)  | C17-C22 | 1.401(8) |
| O7-C28               | 1.249(9)  | C18-C19 | 1.376(9) |
| O8-C28               | 1.247(9)  | C19-C20 | 1.386(9) |
| O9-C23               | 1.252(9)  | C20-C21 | 1.393(9) |

|         |           |         |           |
|---------|-----------|---------|-----------|
| O10-C23 | 1.248(8)  | C20-C23 | 1.518(9)  |
| N2-C35  | 1.320(9)  | C21-C22 | 1.373(9)  |
| N2-C36  | 1.464(10) | C24-C25 | 1.393(9)  |
| N2-C37  | 1.469(11) | C24-C30 | 1.394(9)  |
| C1-C2   | 1.500(8)  | C25-C26 | 1.380(9)  |
| C2-C3   | 1.388(9)  | C26-C27 | 1.374(10) |
| C2-C7   | 1.396(9)  | C27-C28 | 1.521(9)  |
| C3-C4   | 1.370(9)  | C27-C29 | 1.352(10) |
| C4-C5   | 1.394(8)  | C29-C30 | 1.395(10) |
| C5-C6   | 1.392(9)  |         |           |

<sup>1</sup>  $1 - x, -\frac{1}{2} + y, \frac{1}{2} - z$ ; <sup>2</sup>  $-1 + x, +y, -1 + z$

**Table S2.** Selected angles [°] for **1**

|                                       |           |             |          |
|---------------------------------------|-----------|-------------|----------|
| O1-Zn1-O3                             | 104.7(2)  | C9-C8-C13   | 120.9(5) |
| O1-Zn1-O7 <sup>1</sup>                | 113.6(2)  | C13-C8-C5   | 119.3(5) |
| O1-Zn1-O9 <sup>2</sup>                | 116.4(2)  | C8-C9-C15   | 120.8(5) |
| O7 <sup>1</sup> -Zn1-O3               | 102.7(2)  | C10-C9-C8   | 119.0(5) |
| O7 <sup>1</sup> -Zn1-O9 <sup>2</sup>  | 115.1(2)  | C10-C9-C15  | 120.3(5) |
| O9 <sup>2</sup> -Zn1-O3               | 101.8(2)  | C9-C10-C11  | 121.6(6) |
| O2-Zn2-O1 <sub>w</sub>                | 82.6(2)   | C9-C10-C24  | 119.0(5) |
| O2-Zn2-O6                             | 87.3(2)   | C11-C10-C24 | 119.4(5) |
| O2-Zn2-O5                             | 167.6(4)  | C10-C11-C12 | 118.7(5) |
| O6-Zn2-O1 <sub>w</sub>                | 92.8(2)   | C10-C11-C16 | 119.9(5) |
| O8 <sup>1</sup> -Zn2-O1 <sub>w</sub>  | 86.8(2)   | C12-C11-C16 | 121.4(5) |
| O8 <sup>1</sup> -Zn2-O2               | 96.30(19) | C11-C12-C17 | 119.7(5) |
| O8 <sup>1</sup> -Zn2-O6               | 176.3(2)  | C13-C12-C11 | 120.3(5) |
| O8 <sup>1</sup> -Zn2-O5               | 91.8(3)   | C13-C12-C17 | 120.0(5) |
| O10 <sup>2</sup> -Zn2-O1 <sub>w</sub> | 178.1(2)  | C8-C13-C12  | 119.4(5) |
| O10 <sup>2</sup> -Zn2-O2              | 98.43(19) | C8-C13-C14  | 121.1(5) |
| O10 <sup>2</sup> -Zn2-O6              | 85.7(2)   | C12-C13-C14 | 119.5(5) |
| O10 <sup>2</sup> -Zn2-O8 <sup>1</sup> | 94.60(19) | C18-C17-C12 | 120.7(5) |
| O10 <sup>2</sup> -Zn2-O5              | 90.3(4)   | C18-C17-C22 | 117.9(5) |
| O5-Zn2-O6                             | 97.6(9)   | C22-C17-C12 | 121.4(5) |
| O5-Zn2-O1 <sub>w</sub>                | 88.4(4)   | C19-C18-C17 | 121.4(6) |
| C1-O1-Zn1                             | 125.3(4)  | C18-C19-C20 | 120.5(6) |
| C1-O2-Zn2                             | 142.1(4)  | C19-C20-C21 | 118.7(6) |
| C31-O3-Zn1                            | 117.4(6)  | C19-C20-C23 | 120.6(6) |
| C35-O6-Zn2                            | 122.6(5)  | C21-C20-C23 | 120.7(6) |
| C28-O7-Zn1 <sup>3</sup>               | 122.4(5)  | C22-C21-C20 | 120.7(6) |
| C28-O8-Zn2 <sup>3</sup>               | 141.8(4)  | C21-C22-C17 | 120.8(6) |
| C23-O9-Zn1 <sup>4</sup>               | 123.9(4)  | O9-C23-C20  | 116.1(6) |

|                          |          |             |          |
|--------------------------|----------|-------------|----------|
| C23-O10-Zn2 <sup>4</sup> | 140.3(5) | O10-C23-O9  | 127.4(6) |
| C35-N2-C36               | 121.1(7) | O10-C23-C20 | 116.5(7) |
| C35-N2-C37               | 121.6(7) | C25-C24-C10 | 121.7(6) |
| C36-N2-C37               | 117.2(7) | C25-C24-C30 | 118.4(6) |
| O1-C1-C2                 | 116.0(6) | C30-C24-C10 | 119.9(5) |
| O2-C1-O1                 | 125.6(6) | C26-C25-C24 | 120.3(6) |
| O2-C1-C2                 | 118.3(6) | C27-C26-C25 | 121.0(7) |
| C3-C2-C1                 | 119.8(6) | C26-C27-C28 | 120.4(6) |
| C3-C2-C7                 | 118.3(6) | C29-C27-C26 | 119.1(6) |
| C7-C2-C1                 | 121.9(6) | C29-C27-C28 | 120.5(7) |
| C4-C3-C2                 | 120.8(6) | O7-C28-C27  | 116.2(7) |
| C3-C4-C5                 | 121.5(6) | O8-C28-O7   | 126.3(6) |
| C4-C5-C8                 | 120.7(5) | O8-C28-C27  | 117.5(7) |
| C6-C5-C4                 | 117.5(5) | C27-C29-C30 | 121.7(7) |
| C6-C5-C8                 | 121.8(5) | C24-C30-C29 | 119.4(6) |
| C7-C6-C5                 | 121.4(6) | O3-C31-O4   | 126.1(9) |
| C6-C7-C2                 | 120.5(6) | O6-C35-N2   | 124.6(7) |
| C9-C8-C5                 | 119.8(5) |             |          |

<sup>1</sup>  $1 - x, -\frac{1}{2} + y, \frac{1}{2} - z$ ; <sup>2</sup>  $-1 + x, + y, -1 + z$ ; <sup>3</sup>  $1 - x, \frac{1}{2} + y, \frac{1}{2} - z$ ; <sup>4</sup>  $1 + x, + y, 1 + z$

**Table S3.** Selected bond lengths [Å] for **2**

|                      |           |         |           |
|----------------------|-----------|---------|-----------|
| Cd1-O1               | 2.474(5)  | C8-C13  | 1.419(8)  |
| Cd1-O2               | 2.252(5)  | C9-C10  | 1.366(9)  |
| Cd1-O3 <sup>1</sup>  | 2.334(5)  | C9-C15  | 1.577(8)  |
| Cd1-O4 <sup>1</sup>  | 2.393(4)  | C10-C11 | 1.416(8)  |
| Cd1-O5 <sup>2</sup>  | 2.166(6)  | C10-C17 | 1.516(9)  |
| Cd1-O7               | 2.297(5)  | C11-C12 | 1.402(8)  |
| Cd1-C23 <sup>1</sup> | 2.697(7)  | C11-C16 | 1.541(9)  |
| O1-C1                | 1.279(8)  | C12-C13 | 1.408(9)  |
| O2-C1                | 1.219(8)  | C12-C24 | 1.479(9)  |
| O3-C23               | 1.245(8)  | C13-C14 | 1.501(8)  |
| O4-C23               | 1.253(9)  | C17-C18 | 1.408(10) |
| O5-C30               | 1.243(10) | C17-C22 | 1.392(10) |
| O6-C30               | 1.242(9)  | C18-C19 | 1.333(9)  |
| O7-C31               | 1.254(8)  | C19-C20 | 1.368(10) |
| N1-C31               | 1.301(9)  | C20-C21 | 1.361(9)  |
| N1-C32               | 1.474(8)  | C20-C23 | 1.522(9)  |
| N1-C33               | 1.456(9)  | C21-C22 | 1.366(8)  |
| C1-C2                | 1.492(9)  | C24-C25 | 1.409(11) |
| C2-C3                | 1.362(9)  | C24-C29 | 1.388(9)  |
| C2-C7                | 1.377(8)  | C25-C26 | 1.394(9)  |

|       |          |         |           |
|-------|----------|---------|-----------|
| C3-C4 | 1.359(9) | C26-C27 | 1.354(9)  |
| C4-C5 | 1.404(9) | C27-C28 | 1.378(10) |
| C5-C6 | 1.380(9) | C27-C30 | 1.510(9)  |
| C5-C8 | 1.499(9) | C28-C29 | 1.368(9)  |
| C6-C7 | 1.388(9) | N2-C34  | 1.420(11) |
| C8-C9 | 1.405(9) | N2-C35  | 1.429(11) |

<sup>1</sup>  $\frac{5}{4} - x, -\frac{1}{4} + y, -\frac{1}{4} + z$ ; <sup>2</sup>  $\frac{3}{4} - x, -\frac{1}{4} + y, \frac{1}{4} + z$

**Table S4.** Selected angles [°] for **2**

|                                       |            |                         |          |
|---------------------------------------|------------|-------------------------|----------|
| O1-Cd1-C23 <sup>1</sup>               | 137.6(2)   | C8-C9-C15               | 121.0(6) |
| O2-Cd1-O1                             | 54.64(17)  | C10-C9-C8               | 121.5(6) |
| O2-Cd1-O3 <sup>1</sup>                | 110.50(18) | C10-C9-C15              | 117.4(6) |
| O2-Cd1-O4 <sup>1</sup>                | 90.96(17)  | C9-C10-C11              | 119.0(6) |
| O2-Cd1-O7                             | 89.42(19)  | C9-C10-C17              | 123.3(6) |
| O2-Cd1-C23 <sup>1</sup>               | 102.1(2)   | C11-C10-C17             | 117.7(6) |
| O3 <sup>1</sup> -Cd1-O1               | 161.81(16) | C10-C11-C16             | 120.2(6) |
| O3 <sup>1</sup> -Cd1-O4 <sup>1</sup>  | 55.13(17)  | C12-C11-C10             | 120.3(6) |
| O3 <sup>1</sup> -Cd1-C23 <sup>1</sup> | 27.4(2)    | C12-C11-C16             | 119.5(6) |
| O4 <sup>1</sup> -Cd1-O1               | 110.92(18) | C11-C12-C13             | 121.0(6) |
| O4 <sup>1</sup> -Cd1-C23 <sup>1</sup> | 27.7(2)    | C11-C12-C24             | 120.7(6) |
| O5 <sup>2</sup> -Cd1-O1               | 95.1(2)    | C13-C12-C24             | 118.2(6) |
| O5 <sup>2</sup> -Cd1-O2               | 148.5(2)   | C8-C13-C14              | 121.5(6) |
| O5 <sup>2</sup> -Cd1-O3 <sup>1</sup>  | 100.8(2)   | C12-C13-C8              | 117.6(6) |
| O5 <sup>2</sup> -Cd1-O4 <sup>1</sup>  | 110.1(2)   | C12-C13-C14             | 120.9(6) |
| O5 <sup>2</sup> -Cd1-O7               | 87.4(2)    | C18-C17-C10             | 120.9(7) |
| O5 <sup>2</sup> -Cd1-C23 <sup>1</sup> | 107.4(2)   | C22-C17-C10             | 121.3(7) |
| O7-Cd1-O1                             | 99.64(18)  | C22-C17-C18             | 117.8(6) |
| O7-Cd1-O3 <sup>1</sup>                | 89.90(18)  | C19-C18-C17             | 119.6(8) |
| O7-Cd1-O4 <sup>1</sup>                | 142.52(18) | C18-C19-C20             | 123.5(8) |
| O7-Cd1-C23 <sup>1</sup>               | 116.4(2)   | C19-C20-C23             | 122.1(7) |
| C1-O1-Cd1                             | 86.0(4)    | C21-C20-C19             | 117.1(7) |
| C1-O2-Cd1                             | 97.9(4)    | C21-C20-C23             | 120.7(7) |
| C23-O3-Cd1 <sup>3</sup>               | 92.8(5)    | C20-C21-C22             | 122.4(7) |
| C23-O4-Cd1 <sup>3</sup>               | 89.8(4)    | C21-C22-C17             | 119.7(7) |
| C30-O5-Cd1 <sup>4</sup>               | 112.4(6)   | O3-C23-Cd1 <sup>3</sup> | 59.8(4)  |
| C31-O7-Cd1                            | 122.7(5)   | O3-C23-O4               | 122.3(7) |
| C31-N1-C32                            | 122.7(7)   | O3-C23-C20              | 119.2(8) |
| C31-N1-C33                            | 122.0(7)   | O4-C23-Cd1 <sup>3</sup> | 62.5(4)  |

|            |          |                          |          |
|------------|----------|--------------------------|----------|
| C33-N1-C32 | 115.3(7) | O4-C23-C20               | 118.5(7) |
| O1-C1-C2   | 118.6(7) | C20-C23-Cd1 <sup>3</sup> | 178.9(6) |
| O2-C1-O1   | 121.3(7) | C25-C24-C12              | 119.4(7) |
| O2-C1-C2   | 120.1(7) | C29-C24-C12              | 123.4(7) |
| C3-C2-C1   | 124.6(7) | C29-C24-C25              | 117.2(7) |
| C3-C2-C7   | 116.7(6) | C26-C25-C24              | 121.2(7) |
| C7-C2-C1   | 118.7(7) | C27-C26-C25              | 120.9(8) |
| C4-C3-C2   | 123.9(7) | C26-C27-C28              | 117.3(7) |
| C3-C4-C5   | 119.2(7) | C26-C27-C30              | 119.9(8) |
| C4-C5-C8   | 120.7(7) | C28-C27-C30              | 122.8(7) |
| C6-C5-C4   | 118.2(7) | C29-C28-C27              | 124.0(7) |
| C6-C5-C8   | 121.1(7) | C28-C29-C24              | 119.3(8) |
| C5-C6-C7   | 120.1(7) | O5-C30-C27               | 115.4(8) |
| C2-C7-C6   | 121.8(7) | O6-C30-O5                | 125.8(8) |
| C9-C8-C5   | 119.9(5) | O6-C30-C27               | 118.8(8) |
| C9-C8-C13  | 120.6(6) | O7-C31-N1                | 125.6(8) |
| C13-C8-C5  | 119.5(6) | C34-N2-C35               | 115.7(9) |

<sup>1</sup>  $\frac{5}{4} - x, -\frac{1}{4} + y, -\frac{1}{4} + z$ ; <sup>2</sup>  $\frac{3}{4} - x, -\frac{1}{4} + y, \frac{1}{4} + z$ ; <sup>3</sup>  $\frac{5}{4} - x, \frac{1}{4} + y, \frac{1}{4} + z$ ; <sup>4</sup>  $\frac{3}{4} - x, \frac{1}{4} + y, -\frac{1}{4} + z$

**Table S5.** Selected bond lengths [Å] for **3**

|                      |           |         |           |
|----------------------|-----------|---------|-----------|
| Cd1-O1               | 2.293(5)  | C4-C5   | 1.380(10) |
| Cd1-O21              | 2.339(5)  | C5-C6   | 1.409(10) |
| Cd1-O2               | 2.526(5)  | C5-C8   | 1.482(10) |
| Cd1-O32              | 2.344(5)  | C6-C7   | 1.403(10) |
| Cd1-O33              | 2.385(5)  | C8-C9   | 1.380(10) |
| Cd1-O42              | 2.421(5)  | C8-C13  | 1.417(10) |
| Cd1-O7               | 2.274(5)  | C9-C10  | 1.399(10) |
| Cd1-C1               | 2.748(7)  | C9-C15  | 1.524(9)  |
| Cd1-C23 <sup>2</sup> | 2.724(8)  | C10-C11 | 1.419(10) |
| O1-C1                | 1.254(8)  | C10-C17 | 1.483(10) |
| O2-C1                | 1.279(8)  | C11-C12 | 1.401(11) |
| O3-C23               | 1.292(8)  | C11-C16 | 1.477(11) |
| O4-C23               | 1.239(8)  | C12-C13 | 1.402(10) |
| O7-C31               | 1.235(9)  | C13-C14 | 1.496(11) |
| N1-C31               | 1.305(10) | C17-C18 | 1.383(10) |
| N1-C32               | 1.451(11) | C17-C22 | 1.397(10) |
| N1-C33               | 1.455(10) | C18-C19 | 1.399(10) |
| C1-C2                | 1.510(10) | C19-C20 | 1.377(10) |
| C2-C3                | 1.392(10) | C20-C21 | 1.382(11) |
| C2-C7                | 1.352(10) | C20-C23 | 1.496(10) |



|       |           |         |           |
|-------|-----------|---------|-----------|
| C3-C4 | 1.397(10) | C21-C22 | 1.398(11) |
|-------|-----------|---------|-----------|

$^1 \frac{3}{2} - x, \frac{5}{2} - y, 1 - z; ^2 + x, 3 - y, \frac{1}{2} + z; ^3 \frac{3}{2} - x, \frac{1}{2} + y, \frac{1}{2} - z$

**Table S6.** Selected angles [°] for **3**

|                                       |            |             |          |
|---------------------------------------|------------|-------------|----------|
| O1-Cd1-O2 <sup>1</sup>                | 106.73(18) | O1-C1-O2    | 121.3(7) |
| O1-Cd1-O2                             | 54.28(17)  | O1-C1-C2    | 119.7(7) |
| O1-Cd1-O3 <sup>2</sup>                | 86.33(18)  | O2-C1-Cd1   | 66.5(4)  |
| O1-Cd1-O3 <sup>3</sup>                | 138.91(17) | O2-C1-C2    | 118.8(7) |
| O1-Cd1-O4 <sup>3</sup>                | 94.38(18)  | C2-C1-Cd1   | 164.8(5) |
| O1-Cd1-C1                             | 26.91(19)  | C3-C2-C1    | 118.0(7) |
| O1-Cd1-C23 <sup>3</sup>               | 118.8(2)   | C7-C2-C1    | 121.0(7) |
| O2 <sup>1</sup> -Cd1-O2               | 75.0(2)    | C7-C2-C3    | 121.0(7) |
| O2 <sup>1</sup> -Cd1-O3 <sup>2</sup>  | 166.81(19) | C2-C3-C4    | 118.7(7) |
| O2 <sup>1</sup> -Cd1-O3 <sup>3</sup>  | 94.59(15)  | C5-C4-C3    | 122.0(7) |
| O2 <sup>1</sup> -Cd1-O4 <sup>3</sup>  | 79.00(18)  | C4-C5-C6    | 117.7(7) |
| O2 <sup>1</sup> -Cd1-C1               | 93.6(2)    | C4-C5-C8    | 123.2(7) |
| O2-Cd1-C1                             | 27.67(18)  | C6-C5-C8    | 119.2(7) |
| O2-Cd1-C23 <sup>3</sup>               | 152.9(2)   | C7-C6-C5    | 120.3(7) |
| O2 <sup>1</sup> -Cd1-C23 <sup>3</sup> | 83.9(2)    | C2-C7-C6    | 120.2(7) |
| O3 <sup>2</sup> -Cd1-O2               | 112.64(15) | C9-C8-C5    | 121.0(6) |
| O3 <sup>3</sup> -Cd1-O2               | 166.28(18) | C9-C8-C13   | 119.2(7) |
| O3 <sup>3</sup> -Cd1-O3 <sup>2</sup>  | 76.0(2)    | C13-C8-C5   | 119.6(7) |
| O3 <sup>2</sup> -Cd1-O4 <sup>3</sup>  | 102.25(17) | C8-C9-C10   | 120.5(6) |
| O3 <sup>3</sup> -Cd1-O4 <sup>3</sup>  | 55.14(17)  | C8-C9-C15   | 119.8(6) |
| O3 <sup>2</sup> -Cd1-C1               | 97.63(19)  | C10-C9-C15  | 119.6(7) |
| O3 <sup>3</sup> -Cd1-C1               | 165.8(2)   | C9-C10-C11  | 120.8(7) |
| O3 <sup>3</sup> -Cd1-C23 <sup>3</sup> | 28.28(18)  | C9-C10-C17  | 120.3(6) |
| O3 <sup>2</sup> -Cd1-C23 <sup>3</sup> | 91.5(2)    | C11-C10-C17 | 118.8(7) |
| O4 <sup>3</sup> -Cd1-O2               | 129.23(16) | C10-C11-C16 | 119.9(8) |
| O4 <sup>3</sup> -Cd1-C1               | 115.4(2)   | C12-C11-C10 | 118.6(7) |
| O4 <sup>3</sup> -Cd1-C23 <sup>3</sup> | 27.06(18)  | C12-C11-C16 | 121.5(7) |
| O7-Cd1-O1                             | 121.93(19) | C11-C12-C13 | 120.1(7) |
| O7-Cd1-O2 <sup>1</sup>                | 89.43(19)  | C8-C13-C14  | 119.3(7) |
| O7-Cd1-O2                             | 78.91(18)  | C12-C13-C8  | 120.6(7) |
| O7-Cd1-O3 <sup>2</sup>                | 81.88(18)  | C12-C13-C14 | 120.0(7) |
| O7-Cd1-O3 <sup>3</sup>                | 92.26(18)  | C18-C17-C10 | 123.1(6) |
| O7-Cd1-O4 <sup>3</sup>                | 143.68(19) | C18-C17-C22 | 117.6(7) |
| O7-Cd1-C1                             | 99.4(2)    | C22-C17-C10 | 119.2(7) |
| O7-Cd1-C23 <sup>3</sup>               | 118.2(2)   | C17-C18-C19 | 122.2(7) |
| C23 <sup>3</sup> -Cd1-C1              | 142.2(2)   | C20-C19-C18 | 118.8(7) |
| C1-O1-Cd1                             | 97.2(4)    | C19-C20-C21 | 120.6(7) |

|                                       |          |                          |          |
|---------------------------------------|----------|--------------------------|----------|
| Cd1 <sup>1</sup> -O2-Cd1              | 105.0(2) | C19-C20-C23              | 119.9(7) |
| C1-O2-Cd1                             | 85.8(4)  | C21-C20-C23              | 119.5(7) |
| C1-O2-Cd1 <sup>1</sup>                | 130.0(4) | C20-C21-C22              | 119.8(7) |
| Cd1 <sup>4</sup> -O3-Cd1 <sup>5</sup> | 104.0(2) | C17-C22-C21              | 120.9(7) |
| C23-O3-Cd1 <sup>5</sup>               | 119.7(4) | O3-C23-Cd1 <sup>4</sup>  | 59.3(4)  |
| C23-O3-Cd1 <sup>4</sup>               | 92.4(4)  | O3-C23-C20               | 116.5(7) |
| C23-O4-Cd1 <sup>4</sup>               | 90.2(4)  | O4-C23-Cd1 <sup>4</sup>  | 62.7(4)  |
| C31-O7-Cd1                            | 127.4(5) | O4-C23-O3                | 121.3(7) |
| C31-N1-C32                            | 120.8(7) | O4-C23-C20               | 122.2(7) |
| C31-N1-C33                            | 122.4(7) | C20-C23-Cd1 <sup>4</sup> | 170.1(5) |
| C32-N1-C33                            | 116.8(7) | O7-C31-N1                | 126.2(7) |
| O1-C1-Cd1                             | 55.9(4)  |                          |          |

<sup>1</sup>  $\frac{3}{2} - x$ , <sup>5</sup>  $\frac{5}{2} - y$ ,  $1 - z$ ; <sup>2</sup>  $\frac{3}{2} - x$ ,  $\frac{1}{2} + y$ ,  $\frac{1}{2} - z$ ; <sup>3</sup>  $+ x$ ,  $3 - y$ ,  $\frac{1}{2} + z$ ; <sup>4</sup>  $+ x$ ,  $3 - y$ ,  $-\frac{1}{2} + z$ ; <sup>5</sup>  $\frac{3}{2} - x$ ,  $-\frac{1}{2} + y$ ,  $\frac{1}{2} - z$
